# Supplementary material for: Impact of polyacrylic acid as soil amendment on soil microbial activity under different moisture regimes
Source: Research Square preprint supplement (doi:10.21203/rs.3.rs-6225306/v1), 2025-03-26
Supplement: Supplementary file 1 [file 9805f52dc706e627f8620cf8.docx]

**Table 2** Analysis of variance (ANOVA) of a) WHCmax and b) soil pH for sand (Lufa 2.1) and loam (Lufa 2.4) as function of PAA concentration (conc), incubation time (week), moisture conditions (type). Significant effects and interactions are shown marked in bold, respectively

| **a** WHCmax | | | | | | | | | | | | | | | | | | | | | | | | | | | | |
| --- | --- | --- | --- | --- | --- | --- | --- | --- | --- | --- | --- | --- | --- | --- | --- | --- | --- | --- | --- | --- | --- | --- | --- | --- | --- | --- | --- | --- |
|  |  | Lufa 2.1 | | | | | | | | | | | | | | | Lufa 2.4 | | | | | | | | | | | |
|  | | | | Df | | Sum Sq | | Mean Sq | | F value | | Pr(>F) | | ω2 | | Df | | | Sum Sq | | Mean Sq | | F value | | Pr(>F) | | ω2 | |
| conc | | | | 3 | | 427.50 | | 142.50 | | 110.99 | | **0.0000** | | **0.79** | | 3 | | | 93.35 | | 31.12 | | 7.07 | | **0.0004** | | **0.13** | |
| week | | | | 3 | | 10.87 | | 3.62 | | 2.82 | | **0.0457** | | **0.01** | | 3 | | | 23.52 | | 7.84 | | 1.78 | | 0.1598 | | 0.02 | |
| type | | | | 1 | | 1.14 | | 1.14 | | 0.89 | | 0.3496 | | 0.00 | | 1 | | | 21.16 | | 21.16 | | 4.81 | | **0.0320** | | **0.03** | |
| conc:week | | | | 9 | | 6.37 | | 0.71 | | 0.55 | | 0.8310 | | 0.01 | | 9 | | | 46.61 | | 5.18 | | 1.18 | | 0.3253 | | 0.01 | |
| conc:type | | | | 3 | | 5.18 | | 1.73 | | 1.35 | | 0.2676 | | 0.00 | | 3 | | | 87.75 | | 29.25 | | 6.64 | | **0.0006** | | **0.12** | |
| week:type | | | | 3 | | 0.82 | | 0.27 | | 0.21 | | 0.8871 | | 0.01 | | 3 | | | 10.01 | | 3.34 | | 0.76 | | 0.5219 | | 0.01 | |
| conc:week:type | | | | 9 | | 3.44 | | 0.38 | | 0.30 | | 0.9729 | | 0.02 | | 9 | | | 40.37 | | 4.49 | | 1.02 | | 0.4348 | | 0.00 | |
| Residuals | | | | 64 | | 82.17 | | 1.28 | |  | |  | |  | | 64 | | | 281.76 | | 4.40 | |  | |  | |  | |
| **b** Soil pH | | | | | | | | | | | | | | | | | | | | | | | | | | | |
| conc | | | 3 | | 7.78 | | 2.59 | | 1380.97 | | **0.0000** | | **0.37** | | 3 | | | 0.29 | | 0.10 | | 96.52 | | **0.0000** | | **0.09** | |
| week | | | 3 | | 7.14 | | 2.38 | | 1266.15 | | **0.0000** | | **0.34** | | 3 | | | 0.04 | | 0.01 | | 12.03 | | **0.0000** | | **0.01** | |
| type | | | 1 | | 2.39 | | 2.39 | | 1272.81 | | **0.0000** | | **0.11** | | 1 | | | 1.27 | | 1.27 | | 1258.22 | | **0.0000** | | **0.40** | |
| conc:week | | | 9 | | 0.67 | | 0.07 | | 39.45 | | **0.0000** | | **0.03** | | 9 | | | 0.97 | | 0.11 | | 107.22 | | **0.0000** | | **0.30** | |
| conc:type | | | 3 | | 0.15 | | 0.05 | | 27.16 | | **0.0000** | | **0.01** | | 3 | | | 0.02 | | 0.01 | | 5.60 | | **0.0018** | | **0.00** | |
| week:type | | | 3 | | 2.22 | | 0.74 | | 393.23 | | **0.0000** | | **0.11** | | 3 | | | 0.51 | | 0.17 | | 168.56 | | **0.0000** | | **0.16** | |
| conc:week:type | | | 9 | | 0.34 | | 0.04 | | 20.40 | | **0.0000** | | **0.02** | | 9 | | | 0.04 | | 0.00 | | 4.45 | | **0.0001** | | **0.01** | |
| Residuals | | | 64 | | 0.12 | | 0.00 | |  | |  | |  | | 64 | | | 0.06 | | 0.00 | |  | |  | |  | |

**Table 3** Analysis of variance (Repeated Measures ANOVA) results of the basal soil respiration for sand (Lufa 2.1) and loam (Lufa 2.4) as function of PAA concentration (conc), incubation time (week), moisture conditions (type). Significant effects and interactions are marked in bold, respectively

|  |  | Lufa 2.1 | | | | | | | | Lufa 2.4 | | | | | |
| --- | --- | --- | --- | --- | --- | --- | --- | --- | --- | --- | --- | --- | --- | --- | --- |
| Error: ID | | | | | | | | | | | | | | | |
|  | | | Df | Sum Sq | Mean Sq | F value | Pr(>F) | ω2 | Df | | Sum Sq | Mean Sq | F value | Pr(>F) | ω2 |
| conc | | | 3 | 0.27 | 0.09 | 5.116 | **0.0114** | **0.23** | 3 | | 11.80 | 3.93 | 28.23 | **0.0000** | **0.71** |
| type | | | 1 | 0.01 | 0.01 | 0.742 | 0.4017 | 0.00 | 1 | | 1.71 | 1.71 | 12.25 | **0.0030** | **0.10** |
| conc:type | | | 3 | 0.32 | 0.11 | 6.241 | **0.0052** | **0.29** | 3 | | 0.10 | 0.03 | 0.24 | 0.8702 | 0.00 |
| Residuals | | | 16 | 0.28 | 0.02 |  |  |  | 16 | | 2.30 | 0.14 |  |  |  |
| Error: ID:week | | | | | | | | | | | | | | | |
|  | | | Df | Sum Sq | Mean Sq | F value | Pr(>F) | ω2 | Df | | Sum Sq | Mean Sq | F value | Pr(>F) | ω2 |
| week | | | 3 | 6.93 | 2.31 | 297.54 | **0.0000** | **0.86** | 3 | | 525.4 | 175.12 | 1685.35 | **0.0000** | **0.94** |
| conc:week | | | 9 | 0.60 | 0.07 | 8.57 | **0.0000** | **0.07** | 9 | | 30.4 | 3.38 | 32.52 | **0.0000** | **0.05** |
| type:week | | | 3 | 0.01 | 0.00 | 0.38 | 0.7710 | 0.00 | 3 | | 1.5 | 0.49 | 4.70 | **0.0059** | **0.00** |
| conc:type:week | | | 9 | 0.18 | 0.02 | 2.52 | **0.0188** | **0.01** | 9 | | 0.0 | 0.01 | 0.05 | 0.9999 | 0.00 |
| Residuals | | | 48 | 0.37 | 0.01 |  |  |  | 48 | | 5.0 | 0.10 |  |  |  |

**Table 4** Analysis of variance (ANOVA) results of basal and substrate induced respiration (SIR) for sand (Lufa 2.1) and loam (Lufa 2.4) as function of PAA concentration (conc), incubation time (week), moisture conditions (type), and subdivided for the different substance groups investigated (carbohydrates, amines, carboxylic acid). Significant effects and interactions are marked in bold, respectively

|  |  | Lufa 2.1 | | | | | | | | Lufa 2.4 | | | | | |
| --- | --- | --- | --- | --- | --- | --- | --- | --- | --- | --- | --- | --- | --- | --- | --- |
| Basal | | | | | | | | | | | | | | | |
|  | | | Df | Sum Sq | Mean Sq | F value | Pr(>F) | ω2 | Df | | Sum Sq | Mean Sq | F value | Pr(>F) | ω2 |
| conc | | | 3 | 0.43 | 0.14 | 234.28 | **0.0000** | **0.03** | 3 | | 2.27 | 0.76 | 185.96 | **0.0000** | **0.08** |
| week | | | 3 | 12.20 | 4.07 | 6608.50 | **0.0000** | **0.87** | 3 | | 21.01 | 7.00 | 1723.35 | **0.0000** | **0.77** |
| type | | | 1 | 0.05 | 0.05 | 74.76 | **0.0000** | **0.00** | 1 | | 0.54 | 0.54 | 133.01 | **0.0000** | **0.02** |
| conc:week | | | 9 | 0.45 | 0.05 | 80.84 | **0.0000** | **0.03** | 9 | | 0.70 | 0.08 | 19.16 | **0.0000** | **0.02** |
| conc:type | | | 3 | 0.03 | 0.01 | 17.11 | **0.0000** | **0.00** | 3 | | 0.06 | 0.02 | 4.66 | **0.0033** | **0.00** |
| week:type | | | 3 | 0.41 | 0.14 | 219.47 | **0.0000** | **0.03** | 3 | | 0.85 | 0.28 | 69.58 | **0.0000** | **0.03** |
| conc:week:type | | | 9 | 0.27 | 0.03 | 49.00 | **0.0000** | **0.02** | 9 | | 0.59 | 0.07 | 16.12 | **0.0000** | **0.02** |
| Residuals | | | 352 | 0.22 | 0.00 |  |  |  | 352 | | 1.43 | 0.00 |  |  |  |
| Carbohydrates | | | | | | | | | | | | | | | |
|  | | | Df | Sum Sq | Mean Sq | F value | Pr(>F) | ω2 | Df | | Sum Sq | Mean Sq | F value | Pr(>F) | ω2 |
| conc | | | 3 | 0.26 | 0.09 | 25.63 | **0.0000** | **0.11** | 3 | | 6.53 | 2.18 | 10.70 | **0.0000** | **0.02** |
| week | | | 3 | 0.53 | 0.18 | 52.39 | **0.0000** | **0.22** | 3 | | 59.35 | 19.78 | 97.22 | **0.0000** | **0.20** |
| type | | | 1 | 0.04 | 0.04 | 11.51 | **0.0008** | **0.02** | 1 | | 32.60 | 32.60 | 160.21 | **0.0000** | **0.11** |
| conc:week | | | 9 | 0.13 | 0.01 | 4.29 | **0.0000** | **0.04** | 9 | | 23.83 | 2.65 | 13.01 | **0.0000** | **0.08** |
| conc:type | | | 3 | 0.01 | 0.00 | 0.54 | 0.6566 | 0.00 | 3 | | 19.65 | 6.55 | 32.20 | **0.0000** | **0.07** |
| week:type | | | 3 | 0.07 | 0.02 | 7.32 | **0.0001** | **0.03** | 3 | | 35.15 | 11.72 | 57.57 | **0.0000** | **0.12** |
| conc:week:type | | | 9 | 0.11 | 0.01 | 3.62 | **0.0002** | **0.03** | 9 | | 43.52 | 4.84 | 23.76 | **0.0000** | **0.14** |
| Residuals | | | 352 | 1.19 | 0.00 |  |  |  | 352 | | 71.63 | 0.20 |  |  |  |
| Amines | | | | | | | | | | | | | | | |
|  | | | Df | Sum Sq | Mean Sq | F value | Pr(>F) | ω2 | Df | | Sum Sq | Mean Sq | F value | Pr(>F) | ω2 |
| conc | | | 3 | 0.68 | 0.23 | 30.96 | **0.0000** | **0.13** | 3 | | 5.32 | 1.77 | 5.95 | **0.0006** | **0.02** |
| week | | | 3 | 1.11 | 0.37 | 50.93 | **0.0000** | **0.21** | 3 | | 49.16 | 16.39 | 54.93 | **0.0000** | **0.19** |
| type | | | 1 | 0.10 | 0.10 | 13.49 | **0.0003** | **0.02** | 1 | | 30.88 | 30.88 | 103.52 | **0.0000** | **0.12** |
| conc:week | | | 9 | 0.43 | 0.05 | 6.59 | **0.0000** | **0.07** | 9 | | 8.76 | 0.97 | 3.26 | **0.0008** | **0.02** |
| conc:type | | | 3 | 0.03 | 0.01 | 1.18 | 0.3185 | 0.00 | 3 | | 9.51 | 3.17 | 10.63 | **0.0000** | **0.03** |
| week:type | | | 3 | 0.13 | 0.04 | 5.83 | **0.0007** | **0.02** | 3 | | 27.93 | 9.31 | 31.20 | **0.0000** | **0.10** |
| conc:week:type | | | 9 | 0.15 | 0.02 | 2.25 | **0.0187** | **0.02** | 9 | | 20.88 | 2.32 | 7.78 | **0.0000** | **0.07** |
| Residuals | | | 352 | 2.57 | 0.01 |  |  |  | 352 | | 105.02 | 0.30 |  |  |  |
| Carboxylic Acids | | | | | | | | | | | | | | | |
|  | | | Df | Sum Sq | Mean Sq | F value | Pr(>F) | ω2 | Df | | Sum Sq | Mean Sq | F value | Pr(>F) | ω2 |
| conc | | | 3 | 0.15 | 0.05 | 32.58 | **0.0000** | **0.14** | 3 | | 1.18 | 0.39 | 13.17 | **0.0000** | **0.05** |
| week | | | 3 | 0.23 | 0.08 | 49.90 | **0.0000** | **0.21** | 3 | | 3.30 | 1.10 | 36.84 | **0.0000** | **0.15** |
| type | | | 1 | 0.02 | 0.02 | 12.18 | **0.0005** | **0.02** | 1 | | 2.58 | 2.58 | 86.48 | **0.0000** | **0.12** |
| conc:week | | | 9 | 0.06 | 0.01 | 4.40 | **0.0000** | **0.04** | 9 | | 0.47 | 0.05 | 1.74 | 0.0788 | 0.01 |
| conc:type | | | 3 | 0.01 | 0.00 | 1.70 | 0.1665 | 0.00 | 3 | | 0.38 | 0.13 | 4.20 | **0.0061** | **0.01** |
| week:type | | | 3 | 0.02 | 0.01 | 4.08 | **0.0072** | **0.01** | 3 | | 2.35 | 0.78 | 26.16 | **0.0000** | **0.11** |
| conc:week:type | | | 9 | 0.02 | 0.00 | 1.49 | 0.1509 | 0.01 | 9 | | 0.68 | 0.08 | 2.51 | **0.0085** | **0.02** |
| Residuals | | | 352 | 0.55 | 0.00 |  |  |  | 352 | | 10.52 | 0.03 |  |  |  |
| Variation | | | | | | | | | | | | | | | |
|  | | | Df | Sum Sq | Mean Sq | F value | Pr(>F) | ω2 | Df | | Sum Sq | Mean Sq | F value | Pr(>F) | ω2 |
| conc | | | 3 | 0.01 | 0.00 | 32.15 | **0.0000** | **0.14** | 3 | | 0.02 | 0.01 | 6.03 | **0.0005** | **0.02** |
| week | | | 3 | 0.01 | 0.00 | 26.88 | **0.0000** | **0.12** | 3 | | 0.13 | 0.04 | 42.91 | **0.0000** | **0.15** |
| type | | | 1 | 0.00 | 0.00 | 4.30 | **0.0388** | **0.01** | 1 | | 0.05 | 0.05 | 53.68 | **0.0000** | **0.06** |
| conc:week | | | 9 | 0.01 | 0.00 | 10.92 | **0.0000** | **0.13** | 9 | | 0.09 | 0.01 | 9.72 | **0.0000** | **0.09** |
| conc:type | | | 3 | 0.00 | 0.00 | 0.66 | 0.5780 | 0.00 | 3 | | 0.04 | 0.01 | 13.89 | **0.0000** | **0.05** |
| week:type | | | 3 | 0.00 | 0.00 | 2.75 | **0.0426** | **0.01** | 3 | | 0.06 | 0.02 | 21.60 | **0.0000** | **0.07** |
| conc:week:type | | | 9 | 0.00 | 0.00 | 2.29 | **0.0165** | **0.02** | 9 | | 0.11 | 0.01 | 12.18 | **0.0000** | **0.12** |
| Residuals | | | 352 | 0.05 | 0.00 |  |  |  | 352 | | 0.35 | 0.00 |  |  |  |
